# Supplementary material for: Maximum emergency department overcrowding is correlated with occurrence of unexpected cardiac arrest
Source: Springer Nature journal article supplement (doi:10.1186/s13054-020-03019-w), 2020-06-06
Supplement: MOESM1 [file 18057010]

**Additional table 1. Comparisons of the survival rates between ED occupancy rate at critical and urgent zone according to the time**

| Time<br>(o'clock) | IHCA<br>( <i>n</i> ) | ED occupancy                          |                        |                            | Survival rate<br>(%) |
|-------------------|----------------------|---------------------------------------|------------------------|----------------------------|----------------------|
|                   |                      | ED occupancy rate<br>at critical zone | rate at urgent<br>zone | Total ED<br>occupancy rate |                      |
| 1-2               | 6                    | 0.48±0.18                             | 1.33±0.45              | 0.67±0.22                  | 0.33                 |
| 3-4               | 15                   | 0.66±0.25                             | 1.45±0.60              | 0.73±0.22                  | 0.73                 |
| 5-6               | 14                   | 0.68±0.25                             | 1.31±0.54              | 0.74±0.25                  | 0.5                  |
| 7-8               | 14                   | 0.73±0.30                             | 1.81±0.70              | 0.84±0.28                  | 0.36                 |
| 9-10              | 14                   | 0.76±0.27                             | 1.94±0.56              | 0.92±0.21                  | 0.57                 |
| 11-12             | 18                   | 0.83±0.27                             | 2.23±0.77              | 1.03±0.26                  | 0.67                 |
| 13-14             | 16                   | 0.77±0.21                             | 2.45±0.55              | 1.03±0.20                  | 0.5                  |
| 15-16             | 25                   | 0.87±0.23                             | 2.35±0.63              | 1.07±0.20                  | 0.6                  |
| 17-18             | 20                   | 0.82±0.28                             | 2.07±0.58              | 0.97±0.23                  | 0.5                  |
| 19-20             | 16                   | 0.74±0.24                             | 2.29±0.79              | 1.00±0.24                  | 0.75                 |
| 21-22             | 18                   | 0.63±0.20                             | 1.96±0.69              | 0.88±0.19                  | 0.61                 |
| 23-24             | 11                   | 0.78±0.24                             | 2.12±0.78              | 0.96±0.25                  | 0.64                 |

Abbreviations: ED, emergency department; IHCA, in-hospital cardiac arrest.
